# Supplementary material for: Effects of Ethanol Concentration on Oral Aroma Release After Wine Consumption
Source: Molecules. 2019 Sep 6;24(18):3253. doi: 10.3390/molecules24183253 (PMC6766967; doi:10.3390/molecules24183253)
Supplement: Supplementary file 1 [file molecules-24-03253-s001.pdf]

## Supplementary Materials

**Table S1.** Endogenous concentration of the target aroma compounds in the control wine (0.5% v/v).

| <b><i>Aroma compounds</i></b> | <b><i>Concentration (µg/L) in the control wine (0.5% v/v)</i></b> |           |
|-------------------------------|-------------------------------------------------------------------|-----------|
|                               | <b>Mean</b>                                                       | <b>SD</b> |
| <i>Ethyl butyrate</i>         | 89.3                                                              | 2.4       |
| <i>Isoamyl acetate</i>        | 1.7                                                               | 0.2       |
| <i>Ethyl pentanoate</i>       | n.d                                                               | -         |
| <i>Ethyl hexanoate</i>        | n.d                                                               | -         |
| <i>Ethyl octanoate</i>        | 3.8                                                               | 0.2       |
| <i>Ethyl decanoate</i>        | 9.4                                                               | 3.1       |
